# Supplementary material for: High Hepatitis E Seroprevalence Among Displaced Persons in South Sudan
Source: PubMed Central journal article supplement (PMC5462562; doi:10.4269/ajtmh.16-0620), 2017-06-07
Supplement: SD1.pdf [file SD1.pdf]

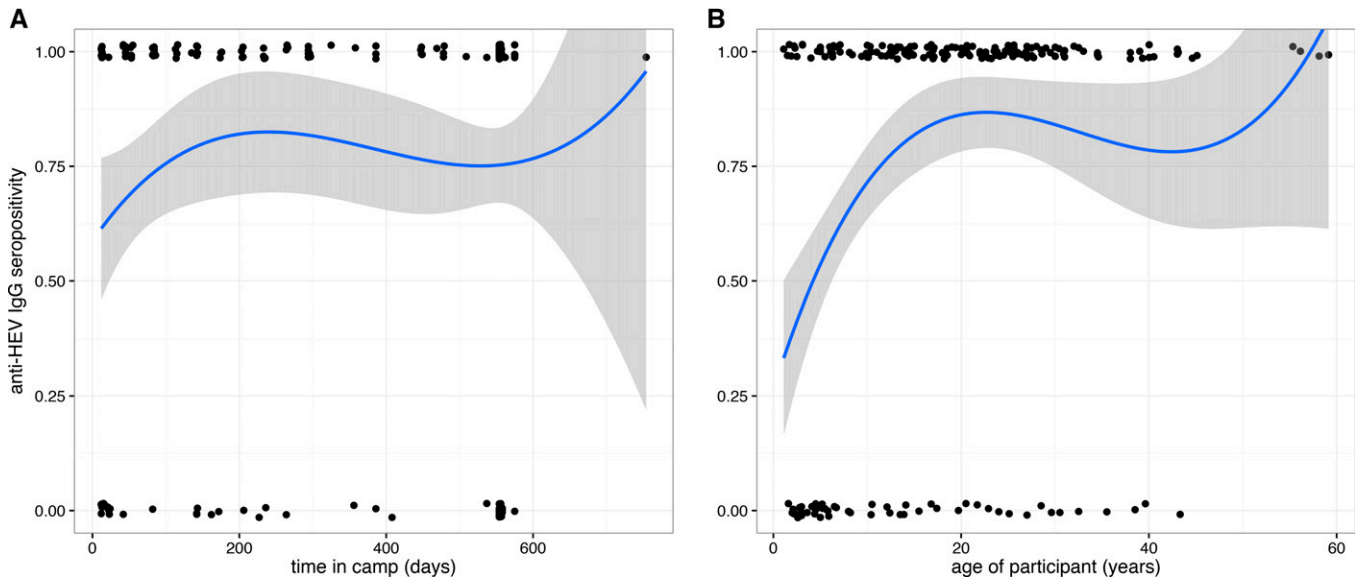

SUPPLEMENTAL FIGURE 1. Anti-hepatitis E virus (HEV) IgG seropositivity by (A) time in camp and (B) age. Blue line represents smoothed (basis splines with 3 degrees of freedom) estimate of proportion seropositive with the grey envelopes representing 95% confidence interval estimates from *geom\_smooth()* in ggplot2 package of R.<sup>32</sup> Points represent positive (1) and negative (0) samples and are jittered for better visual display.

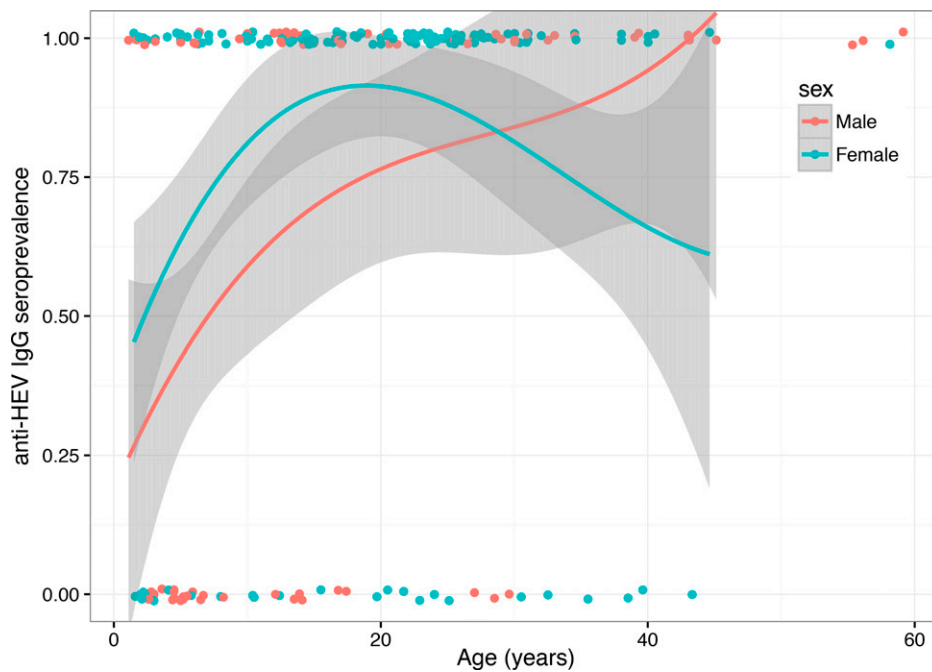

SUPPLEMENTAL FIGURE 2. Anti-hepatitis E virus (HEV) IgG seropositivity by age (x-axis) and sex (color). Lines represent smoothed (basis splines with 3 degrees of freedom) estimates of proportion seropositive with the grey envelopes representing 95% confidence interval estimates as estimated by *geom\_smooth()* in ggplot2 package of R.<sup>32</sup> Points represent positive (1) and negative (0) samples and are jittered for better visual display and smoothed lines excluded high-leverage points at the upper end of the x-axis.

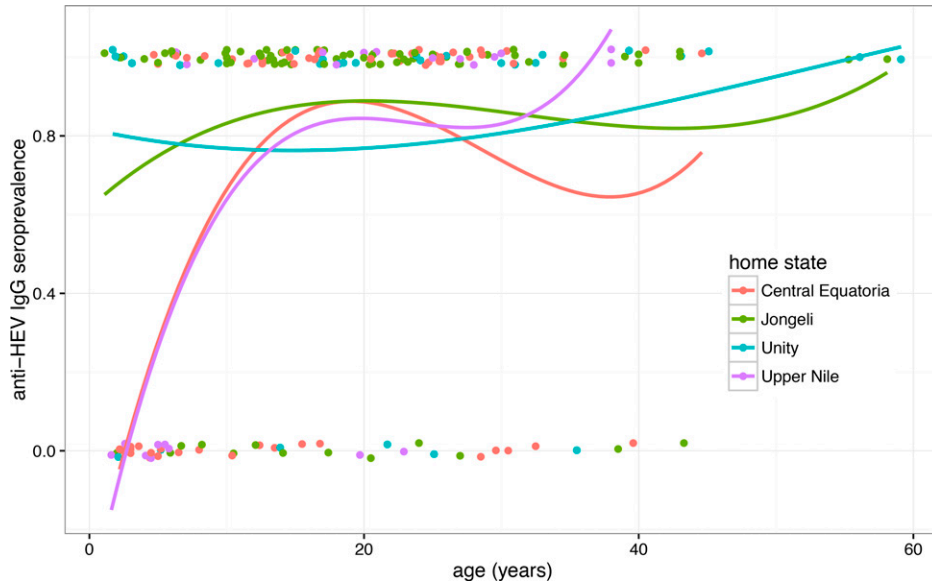

SUPPLEMENTAL FIGURE 3. Anti-hepatitis E virus (HEV) IgG seropositivity by age (x-axis) and home state (color). Lines represent smoothed (basis splines with 3 degrees of freedom) estimates of proportion seropositive with the grey envelopes representing 95% confidence interval estimates as estimated by *geom\_smooth()* in ggplot2 package of R.<sup>32</sup> Points represent positive (1) and negative (0) samples and are jittered for better visual display.

SUPPLEMENTAL TABLE 1

Hazard ratios comparing the risk within the camp to the risk within individuals' home states assuming different times at risk within individuals home states ( $t_{max}$ )

| $t_{max}$ (years) | Hazard ratio | 95% Credible interval |
|-------------------|--------------|-----------------------|
| 15                | 1.2          | 0.1–3.3               |
| 20                | 1.8          | 0.2–4.5               |
| 25                | 2.3          | 0.3–5.8               |
| 30                | 2.8          | 0.3–6.7               |
| 35                | 3.0          | 0.5–7.1               |
| 40                | 3.2          | 0.6–7.4               |

SUPPLEMENTAL TABLE 2

Number and proportion positive to HEV IgG by age and sex category

| Age class (years) | Anti-HEV IgG positive |               |                   |
|-------------------|-----------------------|---------------|-------------------|
|                   | n (proportion)        |               |                   |
|                   | Males                 | Females       | Males and females |
| 1–4               | 5/15 (33%)            | 8/16 (50%)    | 13/31 (42%)       |
| 5–9               | 6/13 (46%)            | 10/12 (83%)   | 16/25 (64%)       |
| 10–19             | 15/21 (71%)           | 33/38 (87%)   | 48/59 (81%)       |
| 20–29             | 10/13 (77%)           | 40/45 (89%)   | 50/58 (86%)       |
| 30–39             | 6/6 (100%)            | 11/16 (69%)   | 17/22 (77%)       |
| 40+               | 7/7 (100%)            | 3/4 (75%)     | 10/11 (91%)       |
| All ages          | 49/75 (65%)           | 105/131 (80%) | 154/206 (75%)     |

HEV = hepatitis E virus.
